# Supplementary material for: Design of triple and quadruple phase boundaries and chemistries for environmental SO2 electrochemical sensing
Source: Royal Society of Chemistry journal article supplement (doi:10.1039/d1ta02399c), 2021-01-01
Supplement: d1ta02399c1.pdf [file d1ta02399c1.pdf]

## Supporting Information

### Design of Triple and Quadruple Phase Boundaries and Chemistries for Environmental SO<sub>2</sub> Electrochemical Sensing

Moran Balaish<sup>a</sup> and Jennifer L.M. Rupp<sup>a,b,\*</sup>

<sup>a</sup>Department of Materials Science and Engineering, Massachusetts Institute of Technology, 77  
Massachusetts Avenue, Cambridge, MA 02139, USA

<sup>b</sup>Department of Electrical Engineering and Computer Science, Massachusetts Institute of  
Technology, 77 Massachusetts Avenue, Cambridge, MA 02139, US

\*Corresponding author email: [jrupp@mit.edu](mailto:jrupp@mit.edu)

The melting points of Li<sub>2</sub>SO<sub>4</sub> and CaSO<sub>4</sub> mixtures containing 0, 20, 33, 50, 67, 80, and 100 mol% CaSO<sub>4</sub> were determined using DSC (**Figure S1**). The results confirmed that the addition of CaSO<sub>4</sub> (20–80 mol%) lowered the melting point of the mixture by ~150 °C from 853 °C (100% Li<sub>2</sub>SO<sub>4</sub>) to ~700 °C, correlating with the reported Li<sub>2</sub>SO<sub>4</sub>–CaSO<sub>4</sub> phase diagram.<sup>17</sup> The results also indicated that a firing temperature of 750 °C was required to ensure complete melting of the Li<sub>2</sub>SO<sub>4</sub>–CaSO<sub>4</sub> sulfate mixture and improve the adhesion between the sensing-electrode layer and the solid electrolyte. Our *in-situ* XRD investigation<sup>12</sup> confirmed that LLZO exhibited excellent stability properties and could support the processing temperature required, i.e. 750 °C, to achieve the complete melting of the solid electrolyte. Thus, the auxiliary electrode chemical composition of Li<sub>2</sub>SO<sub>4</sub>–CaSO<sub>4</sub> in a mole ratio of 1:1 was selected, which was brushed directly on the surface of the LLZO solid-electrolyte pellet, dried, and heated to 750 °C to secure improved adhesion between the dense sensing electrode and solid electrolyte (**Figure 1c**).

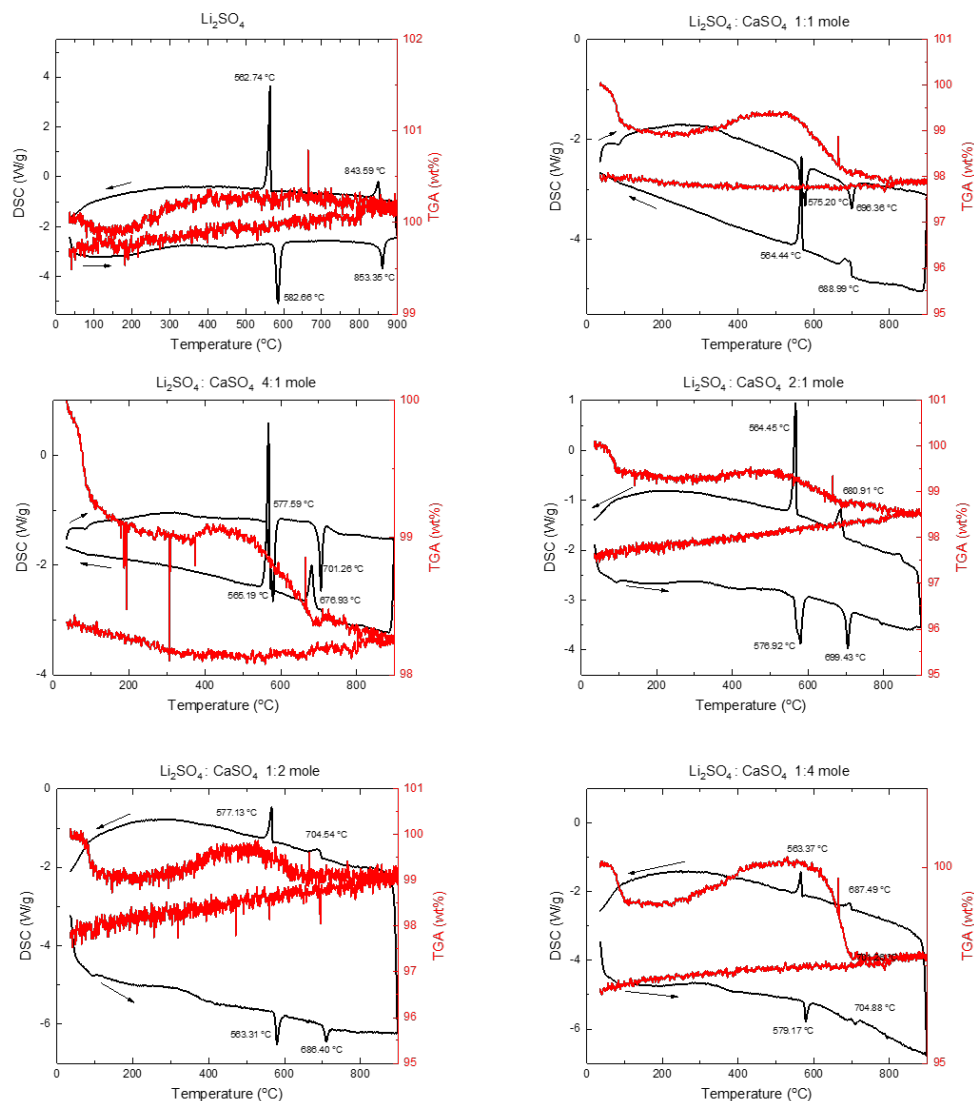

| Mole ratio of $\text{Li}_2\text{SO}_4:\text{CaSO}_4$          | 1:0 | 1:1 | 4:1 | 2:1 | 1:2 | 4:1 |
|---------------------------------------------------------------|-----|-----|-----|-----|-----|-----|
| $T_{\text{Orth} \rightarrow \text{cubic}} [^{\circ}\text{C}]$ | 582 | 575 | 577 | 577 | 577 | 576 |
| $T_m [^{\circ}\text{C}]$                                      | 853 | 696 | 701 | 699 | 705 | 705 |

**Figure S1.** Melting temperature of the sensing electrode as a function of its composition determined via DSC/TGA analysis of different mole ratios of  $\text{Li}_2\text{SO}_4:\text{CaSO}_4$ . The measurement was conducted under synthetic air from room temperature to 900  $^{\circ}\text{C}$ , held for 5 min, and cooled back to room temperature at a ramp rate of 10  $^{\circ}\text{C}/\text{min}$  for both the heating and cooling steps. The melting temperatures are also summarized in the table above.
